# Supplementary material for: Genomic epidemiology of SARS-CoV-2 in a UK university identifies dynamics of transmission
Source: PubMed Central journal article supplement (PMC8826310; doi:10.1038/s41467-021-27942-w), 2022-02-08
Supplement: 41467_2021_27942_MOESM3_ESM.pdf [file 41467_2021_27942_MOESM3_ESM.pdf]

### **Description of Additional Supplementary Files**

File Name: Supplementary Data 1

Description: ENA accession codes of sequences used in this study

File Name: Supplementary Data 2

Description: Genbank accession codes of pooled sample sequences used in this study
